# Supplementary material
Source: PubMed Central journal article supplement (PMC3582847)
Supplement: NIHMS419247-supplement-01.pdf [file NIHMS419247-supplement-01.pdf]

**Supplementary Fig. S1 (pp. 1-8):** Maps of accumulated  $F$  values across all time points of event-related response for the main effect of  $Lmono$  and  $Rmono$  (A),  $LRbin$ ,  $L-R500$ , and  $R-L500$  (B), and  $LRbin$ ,  $L-R500$ , and  $R-L500$  (C) for subjects 1 to 11 (panel C is shown only for subjects 7 to 11). Figure for the subject 12 is shown as Fig. 3 in the main text. Conventions are the same as in Fig. 3 in the main text.

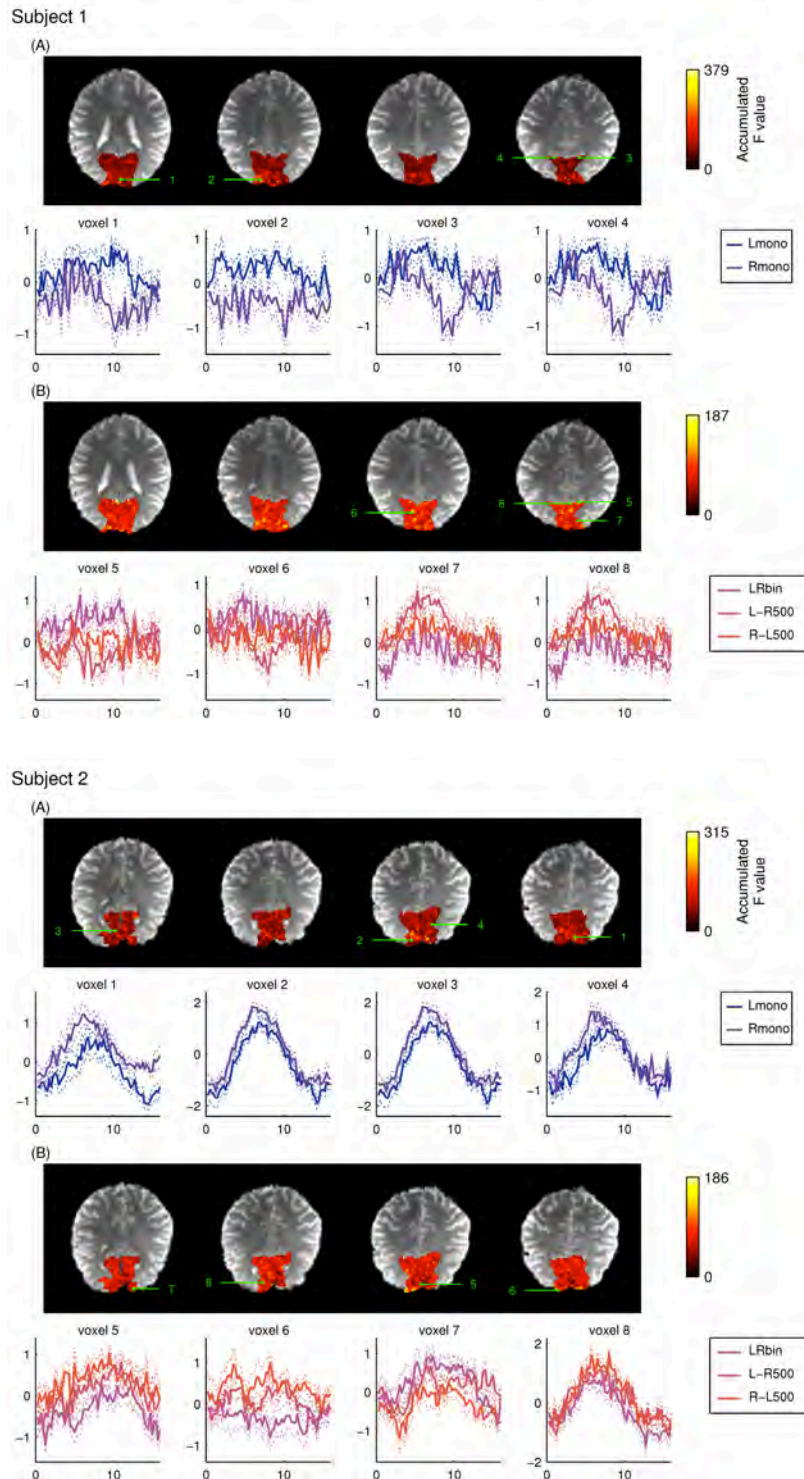

Subject 3

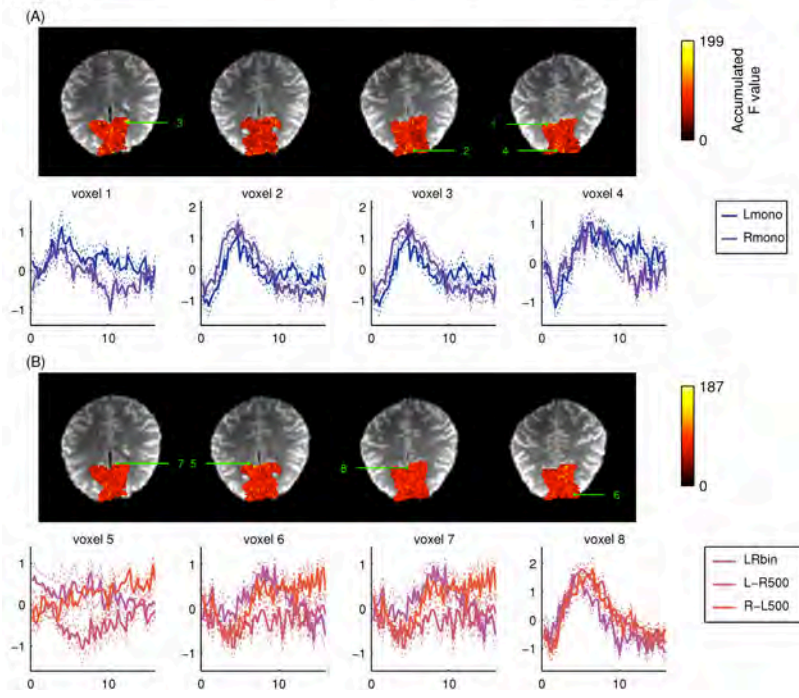

Subject 4

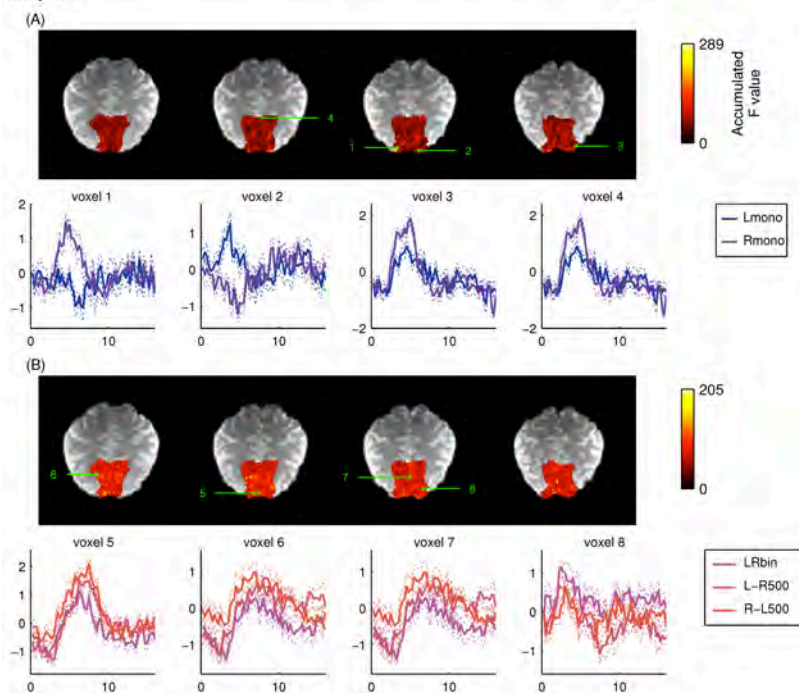

Subject 5

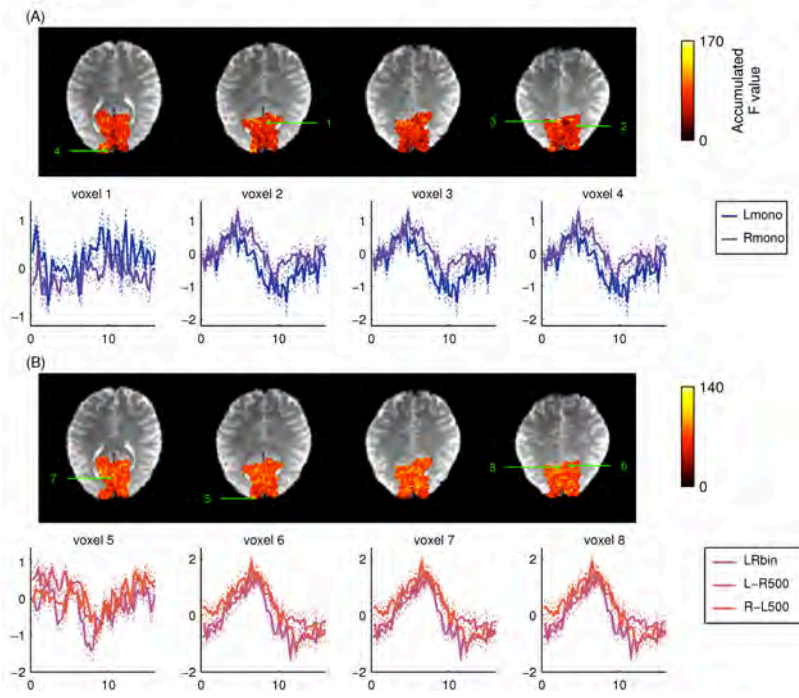

Subject 6

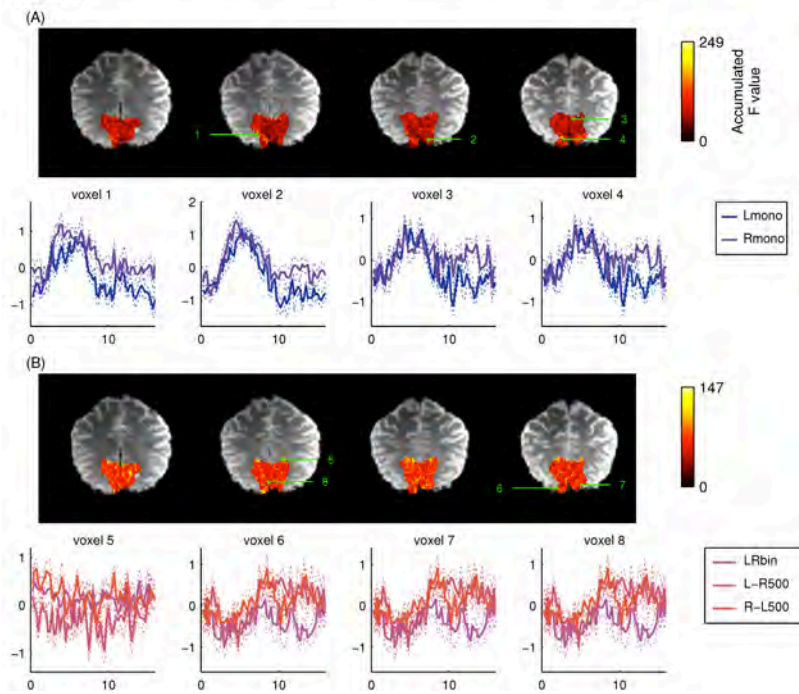

Subject 7

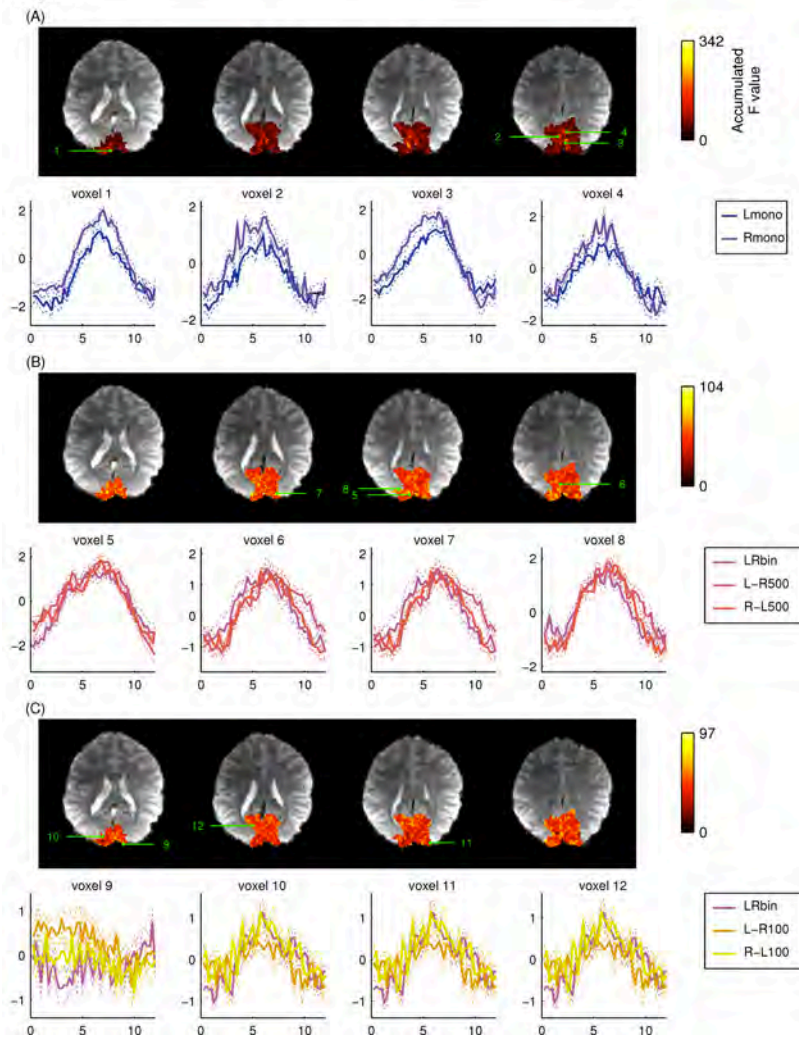

Subject 8

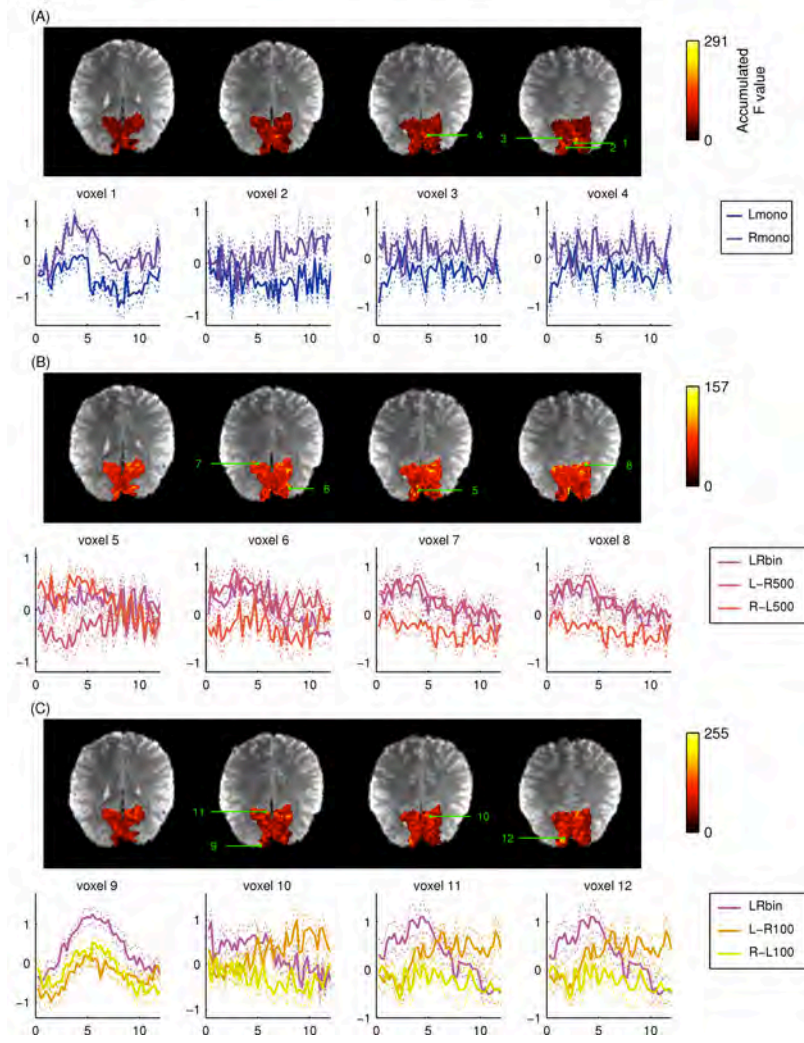

Subject 9

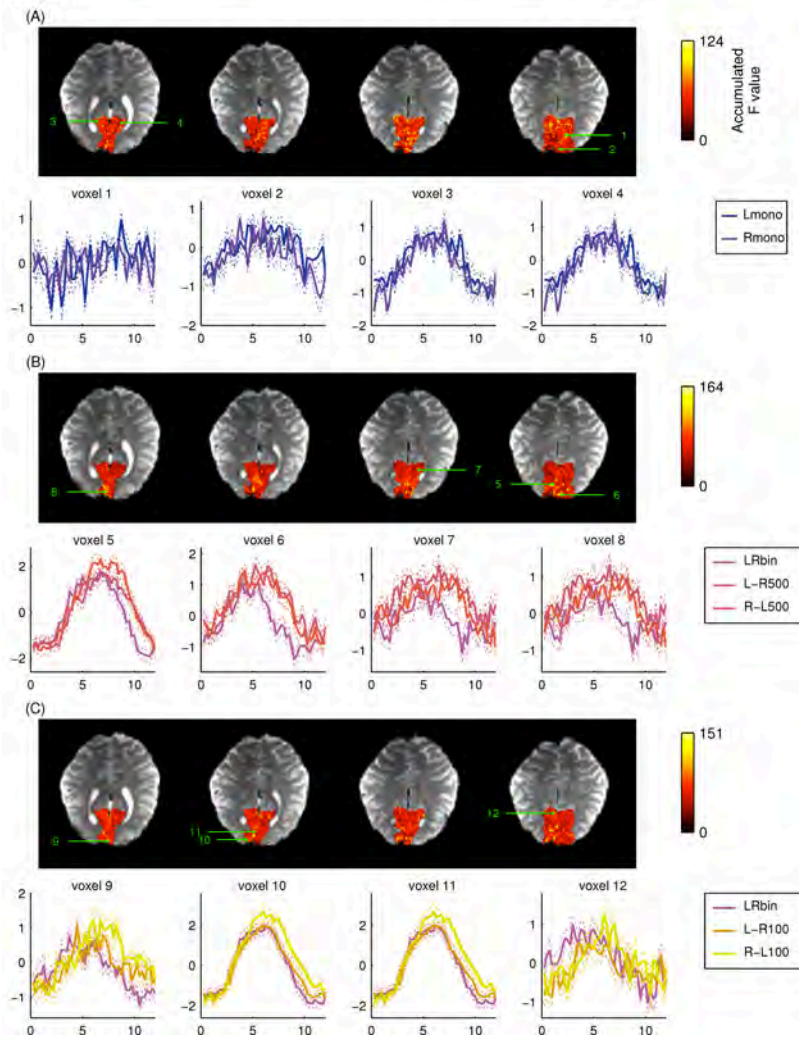

Subject 10

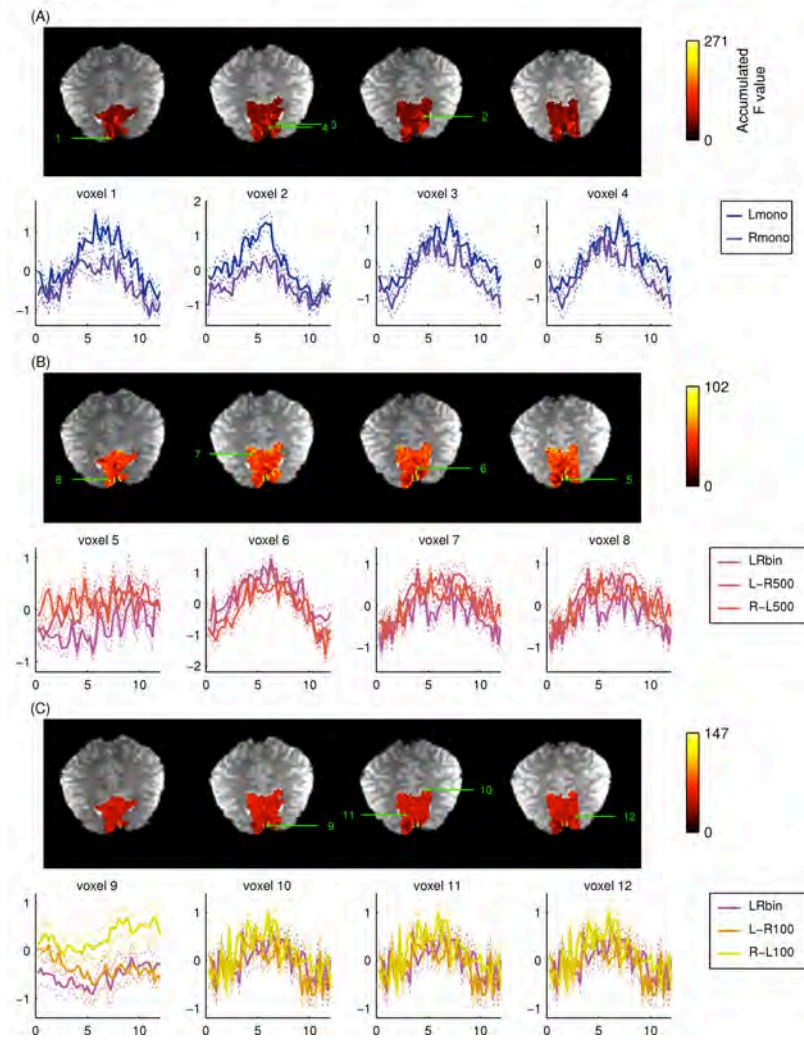

Subject 11

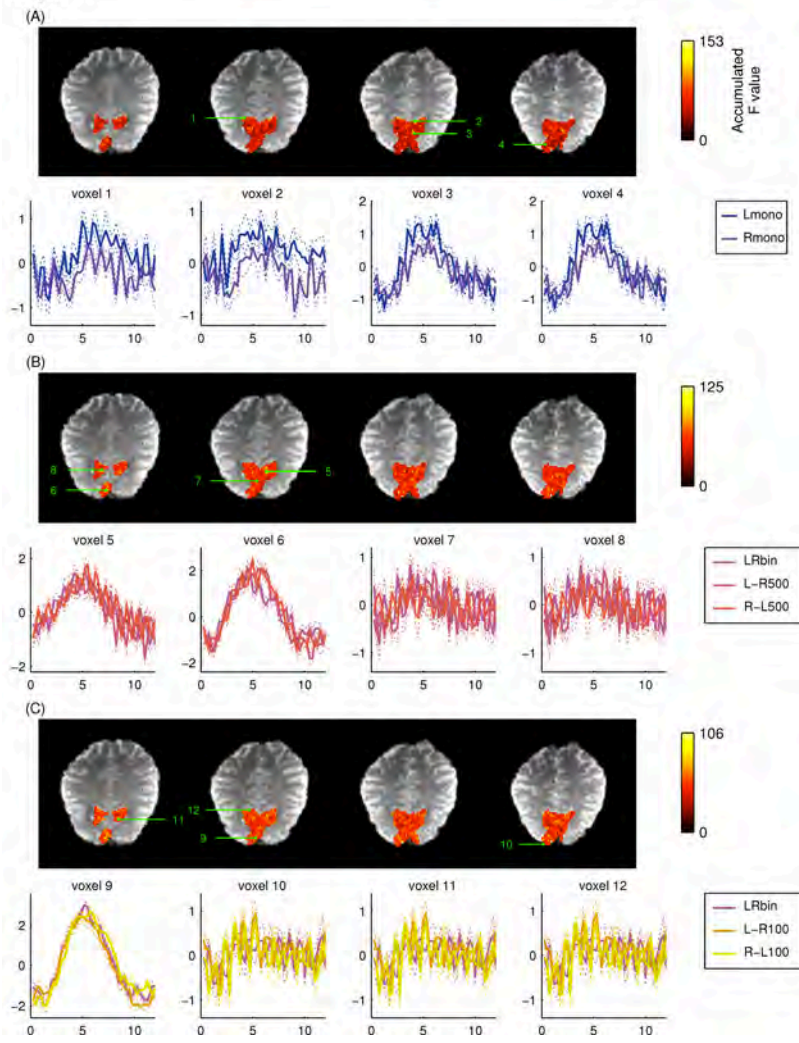



**Supplementary Fig. S2 (pp. 9-26):** Maps of the weight of support vector machine classifier for Lmono:Rmono (A), L-R500:R-L500 (B), L-R500:LRbin (C), R-L500:LRbin (D), L-R100:R-L100 (E), L-R100:LRbin (F), and R-L100:LRbin (G) (panels E to G are shown only for subjects 7 to 11). Conventions are the same as in Fig. 8 in the main text.

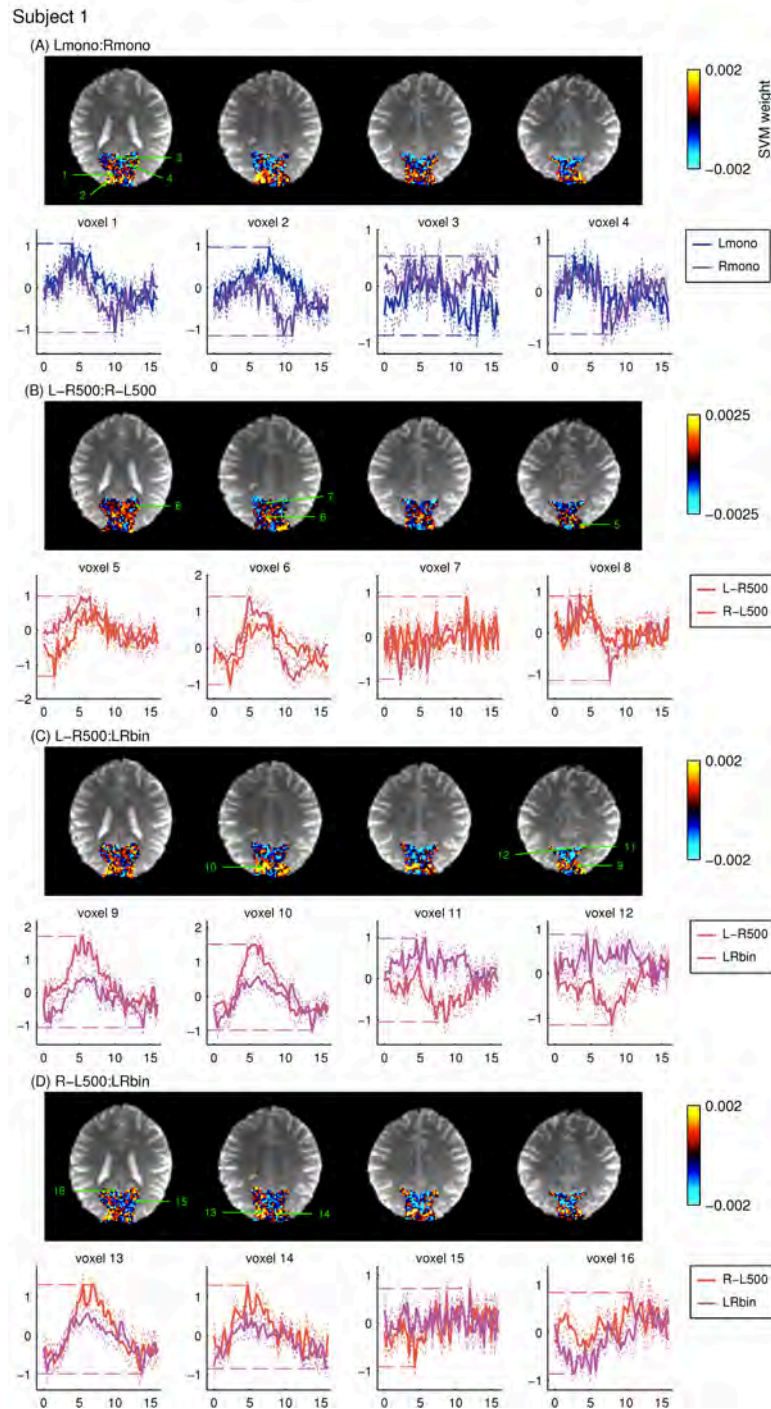

Subject 2

(A) Lmono:Rmono

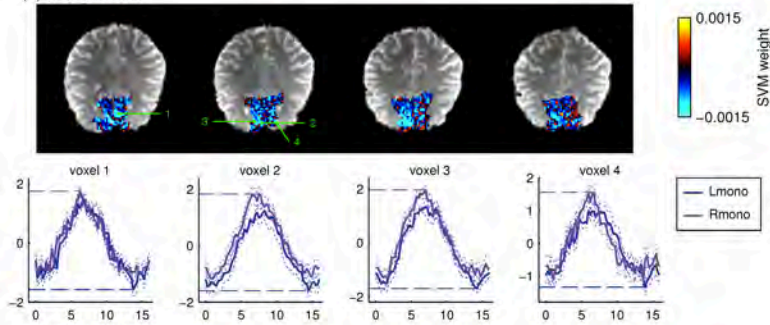

(B) L-R500:R-L500

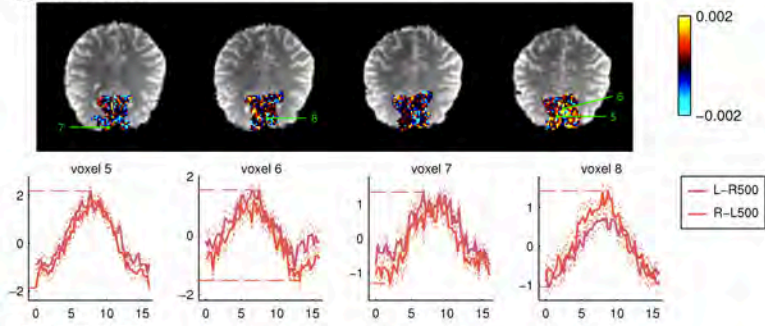

(C) L-R500:L Rbin

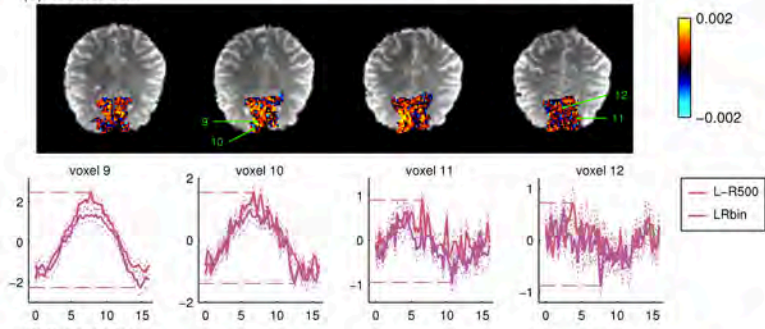

(D) R-L500:L Rbin

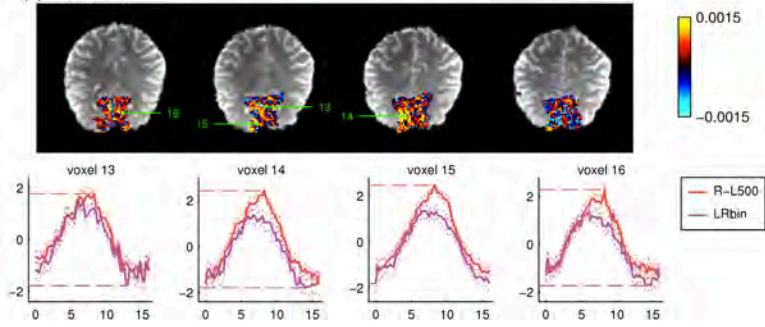

Subject 3

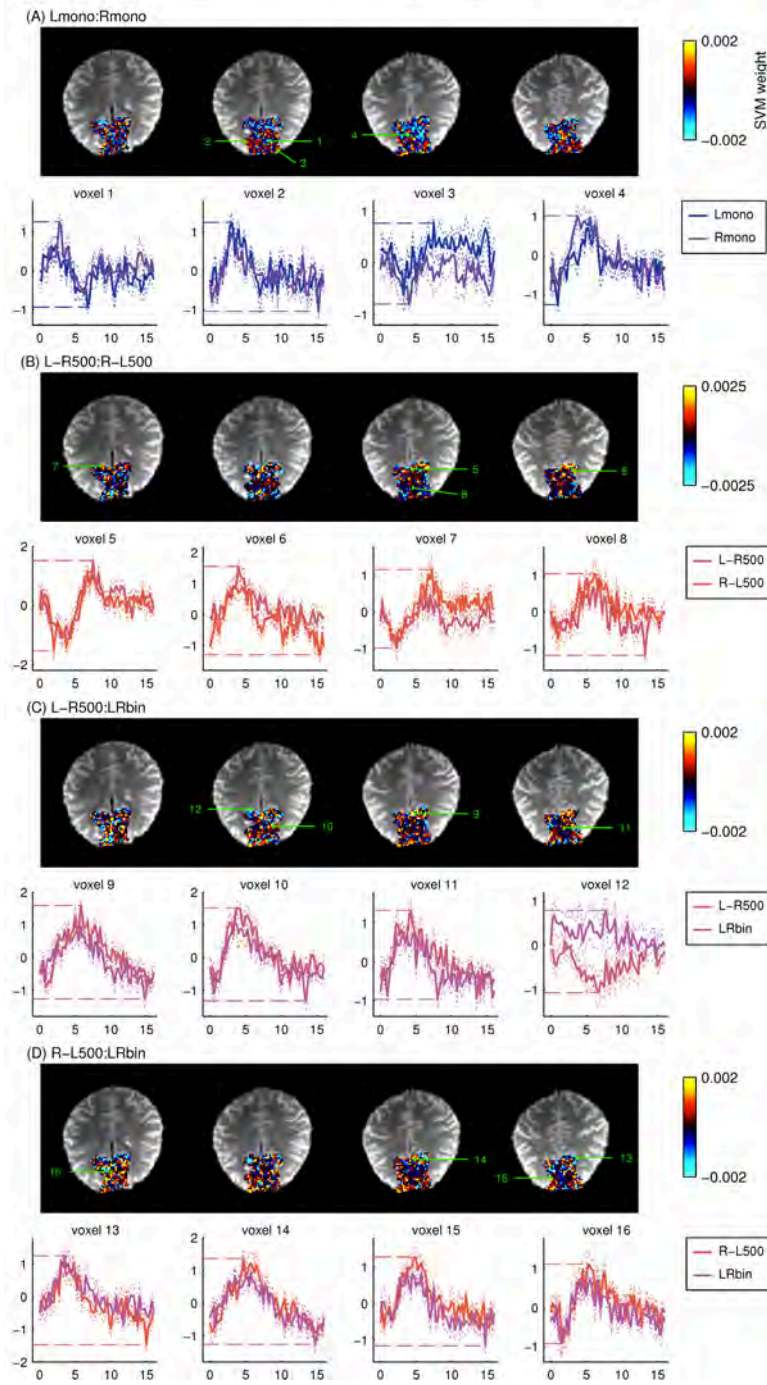

Subject 4

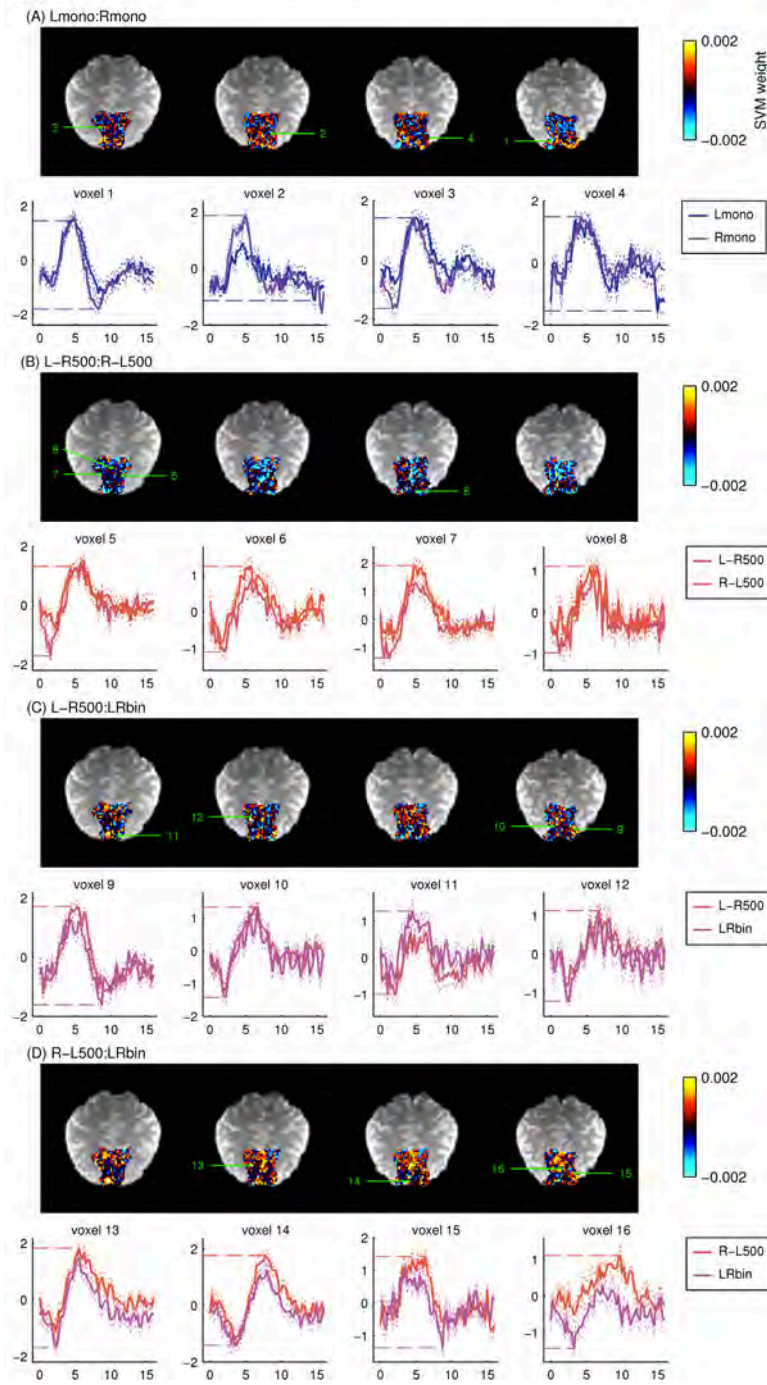

Subject 5

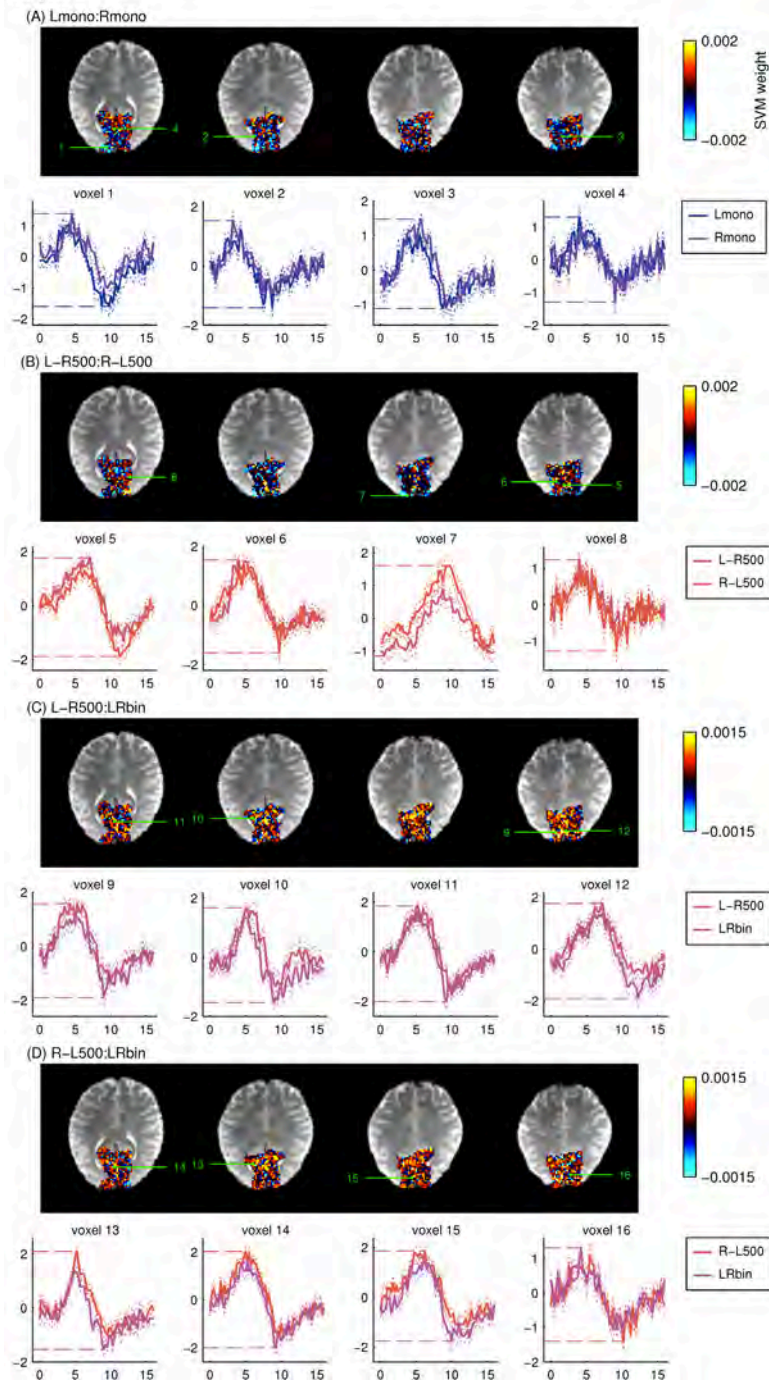

Subject 6

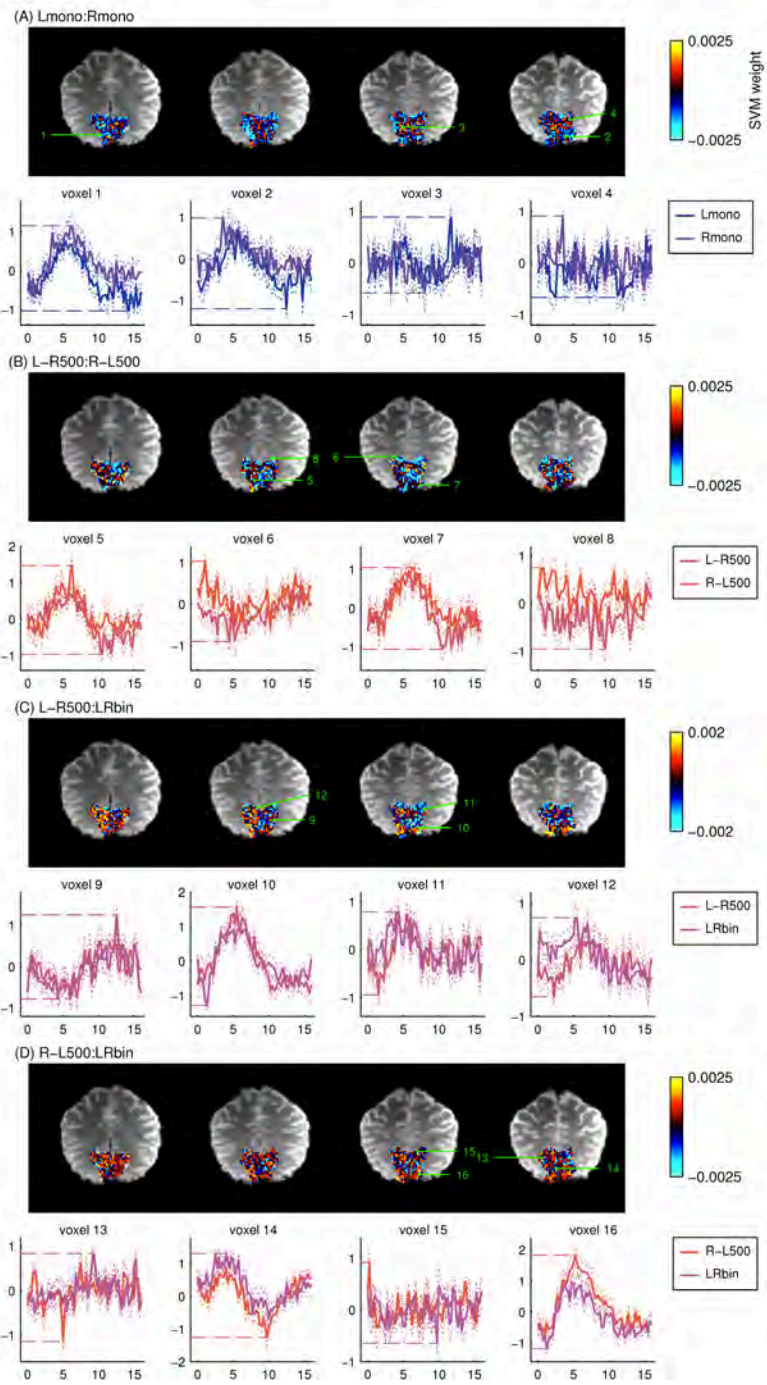

Subject 7 (1)

(A) Lmono:Rmono

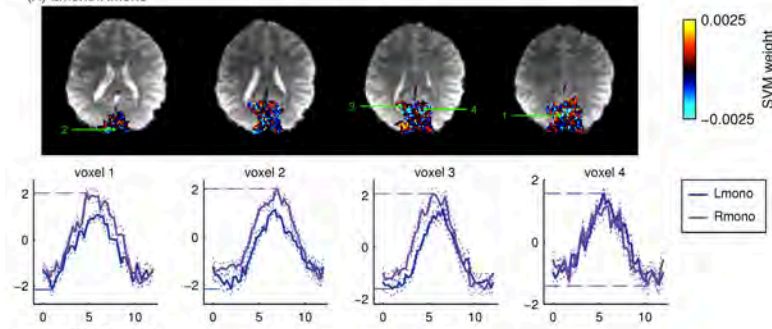

(B) L-R500:R-L500

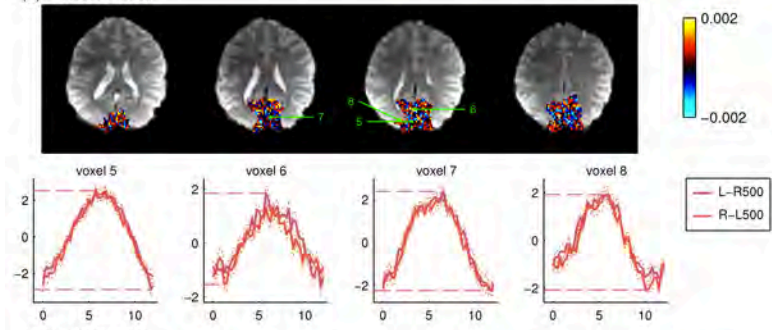

(C) L-R500:LRbin

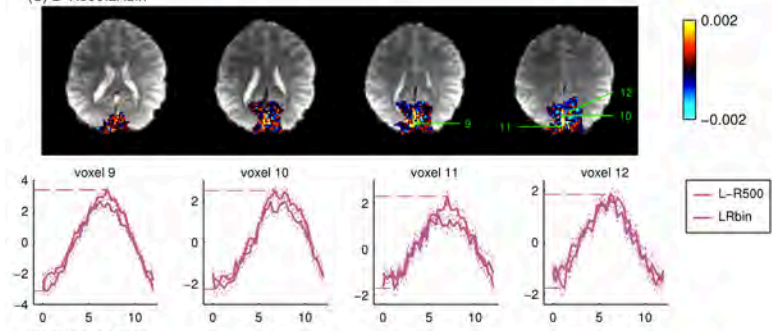

(D) R-L500:LRbin

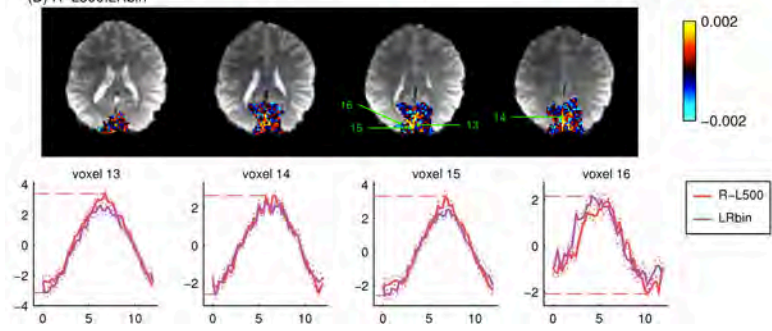

Subject 7 (2)

(E) L-R100:R-L100

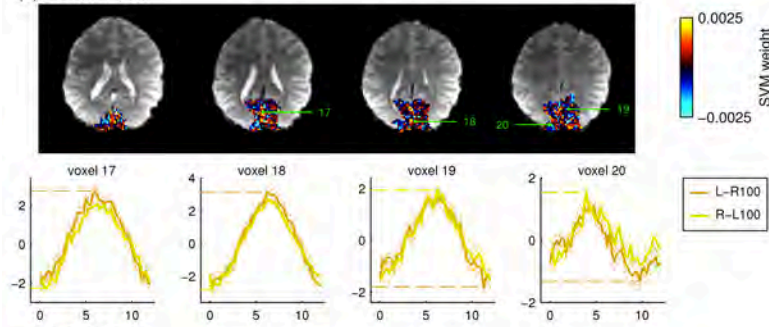

(F) L-R100:LRbin

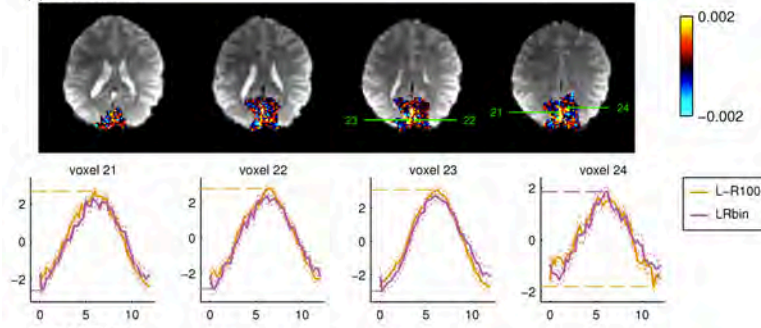

(G) R-L100:LRbin

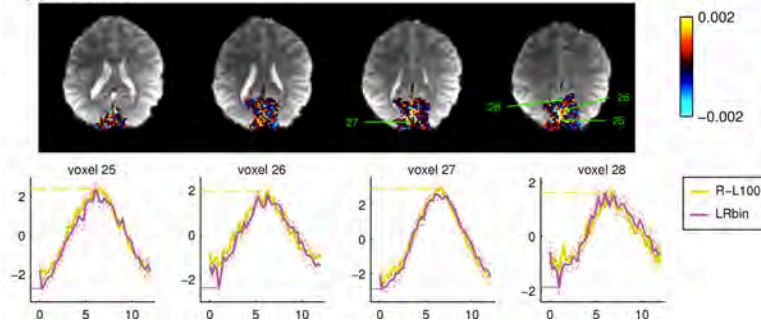



Subject 8 (1)

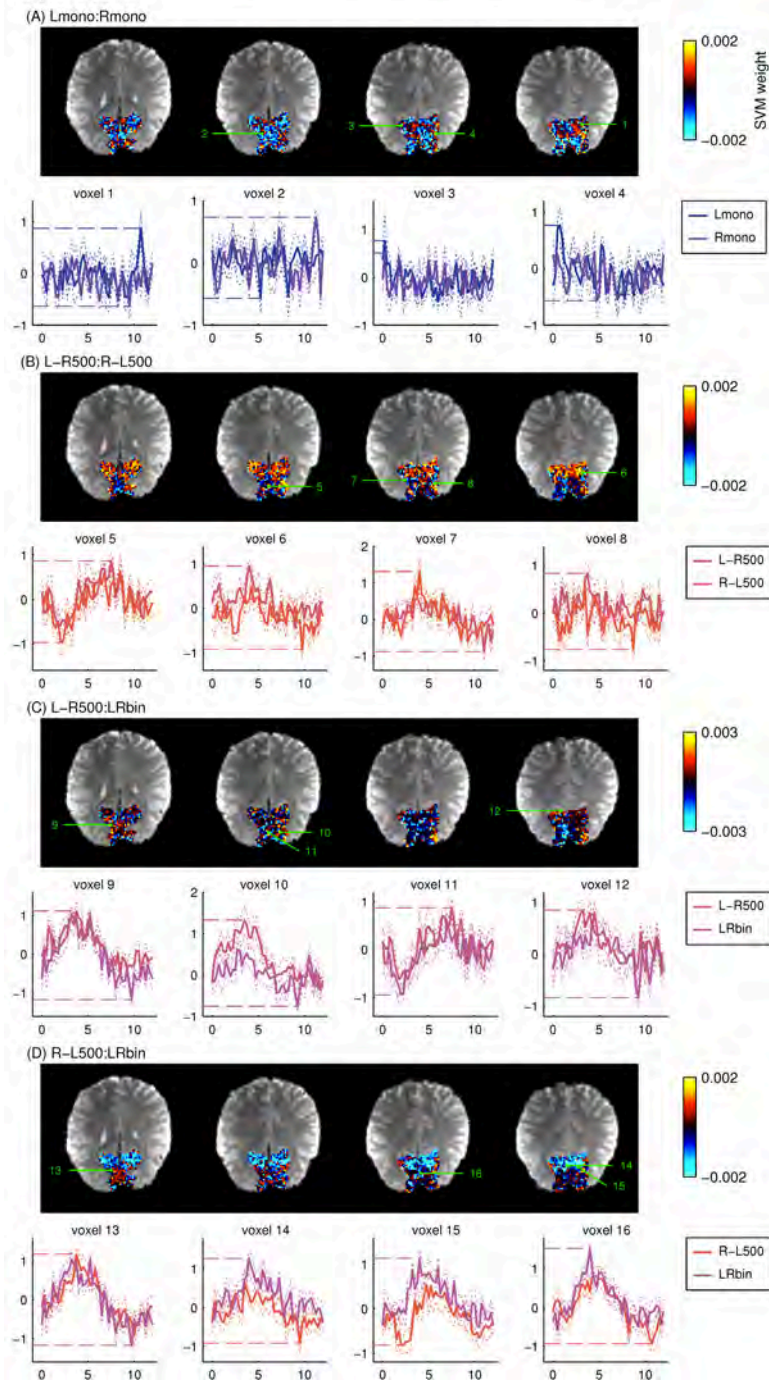

Subject 8 (2)

(E) L-R100:R-L100

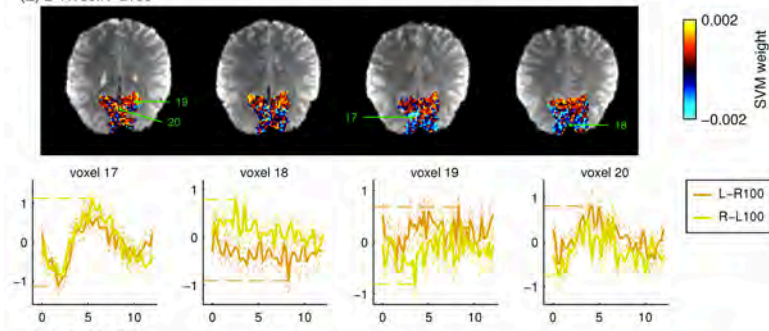

(F) L-R100:LRbin

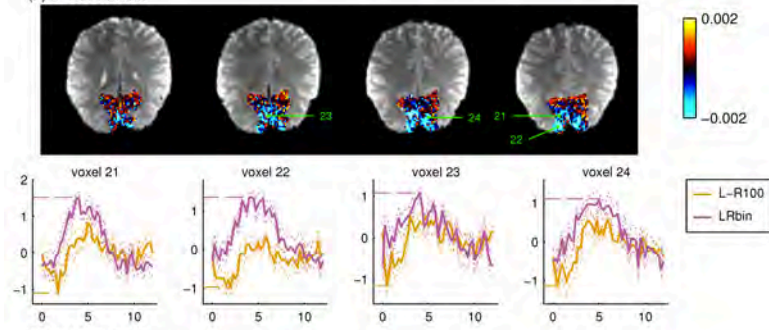

(G) R-L100:LRbin

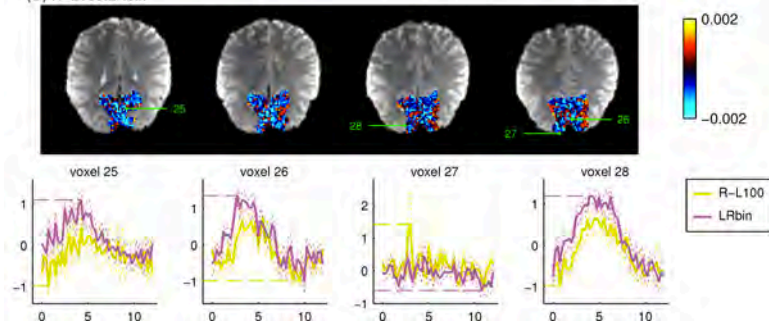

Subject 9 (1)

(A) Lmono:Rmono

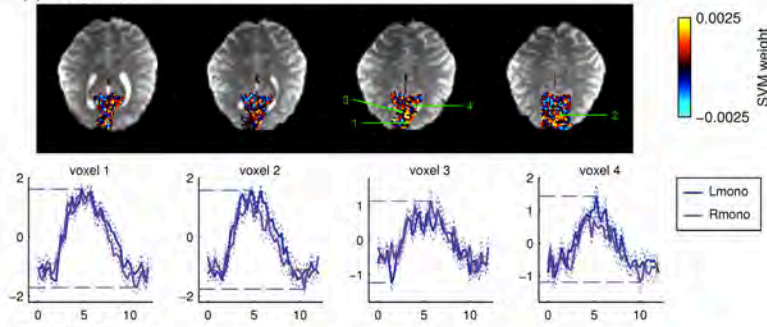

(B) L-R500:R-L500

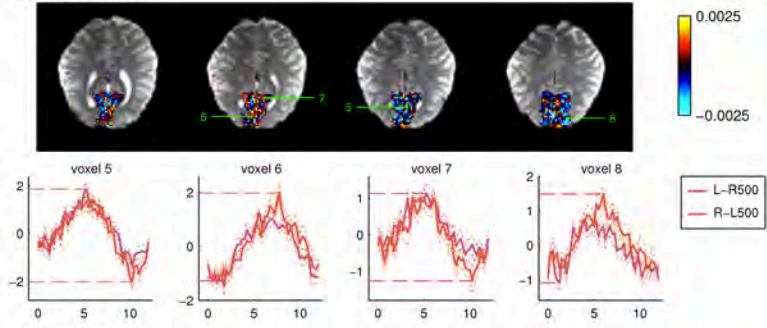

(C) L-R500:LRbin

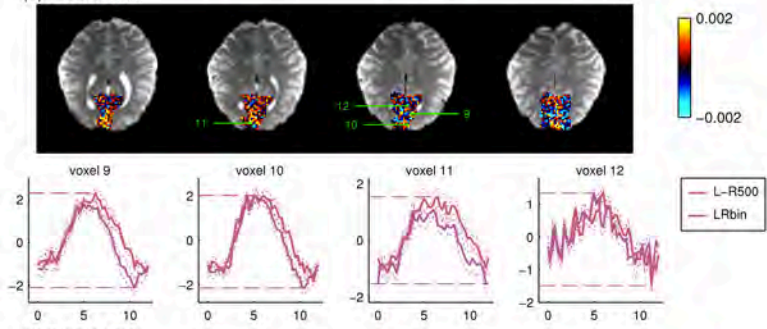

(D) R-L500:LRbin

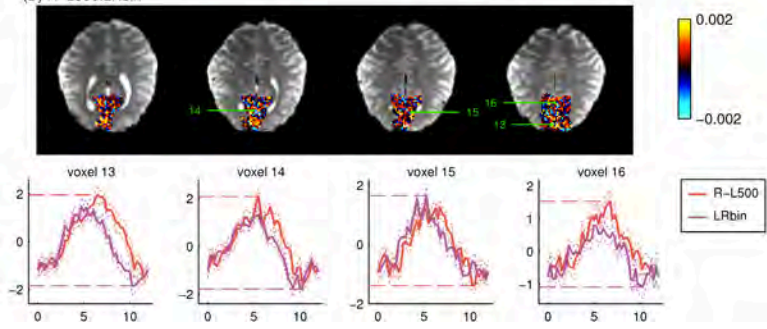

Subject 9 (2)

(E) L-R100:R-L100

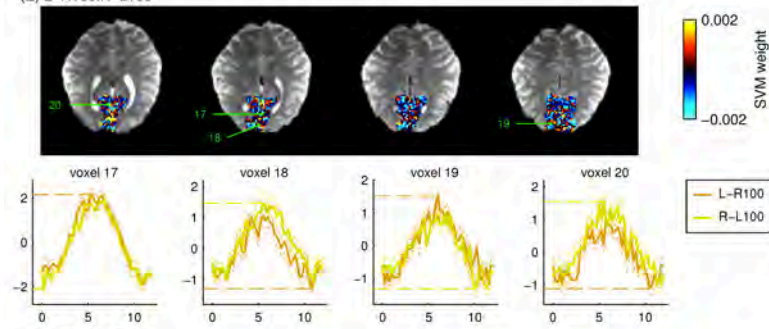

(F) L-R100:LRbin

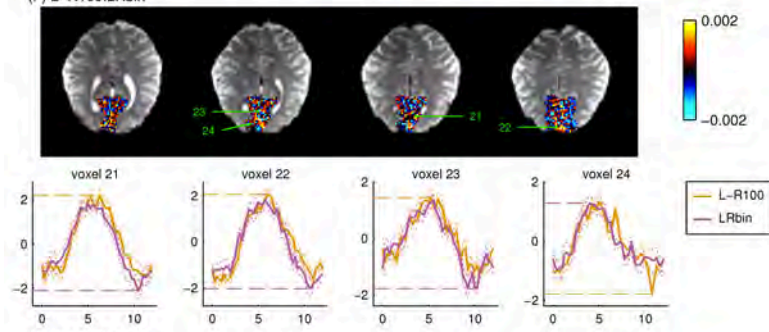

(G) R-L100:LRbin

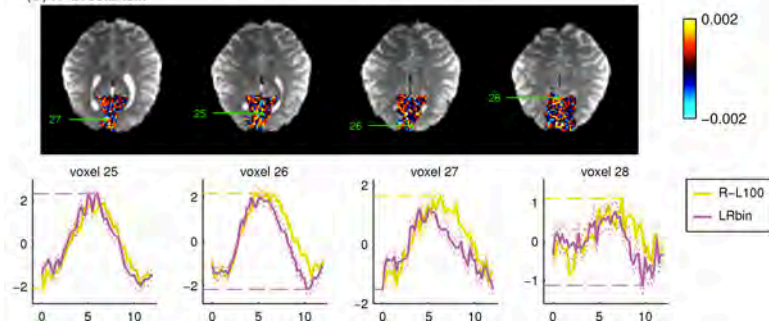

Subject 10 (1)

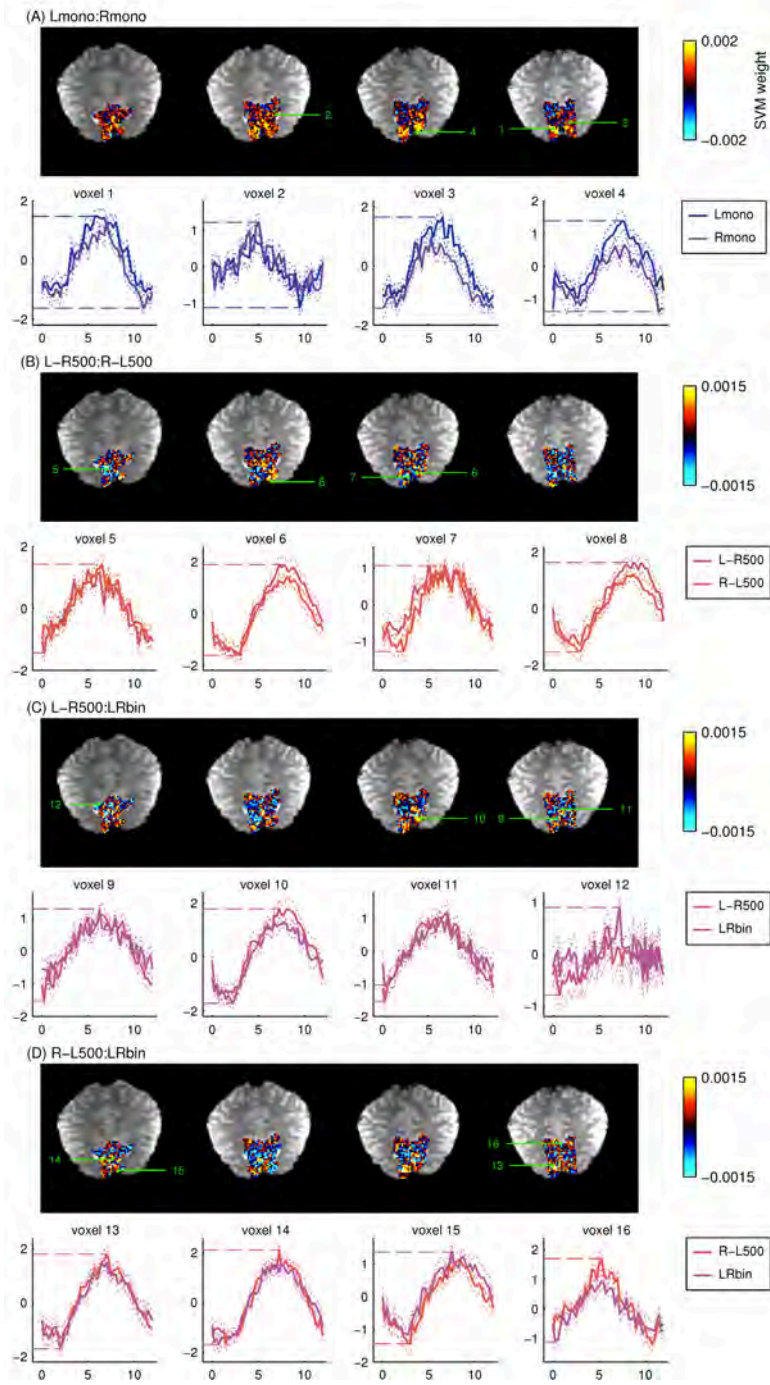

Subject 10 (2)

(E) L-R100:R-L100

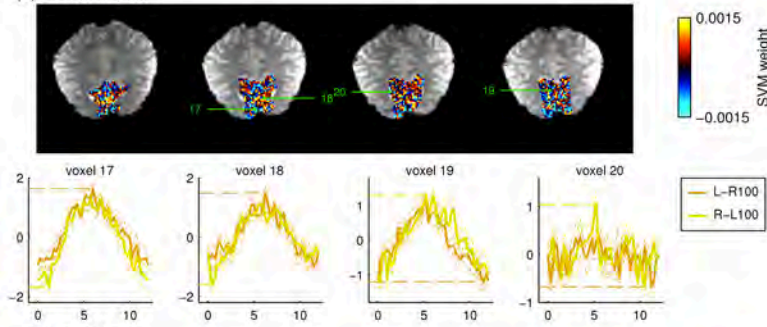

(F) L-R100:LRbin

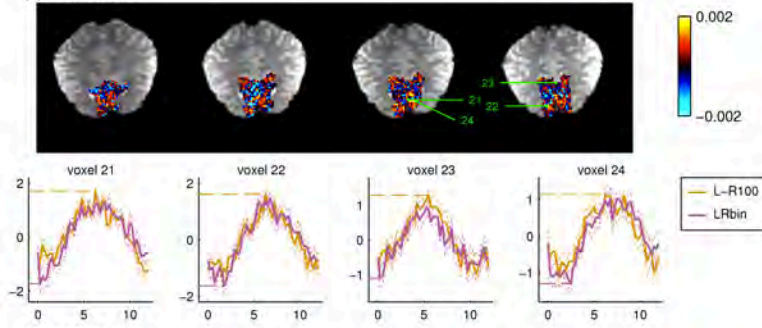

(G) R-L100:LRbin

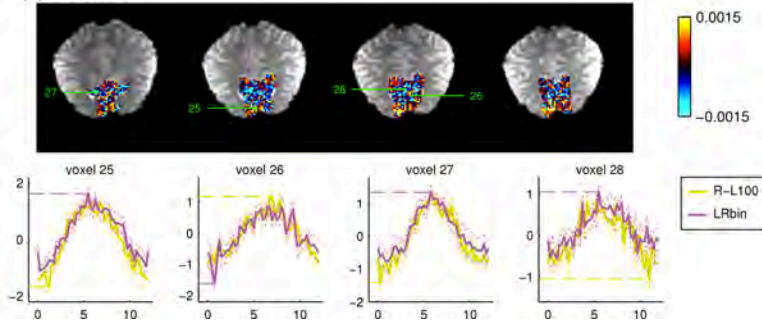

Subject 11 (1)

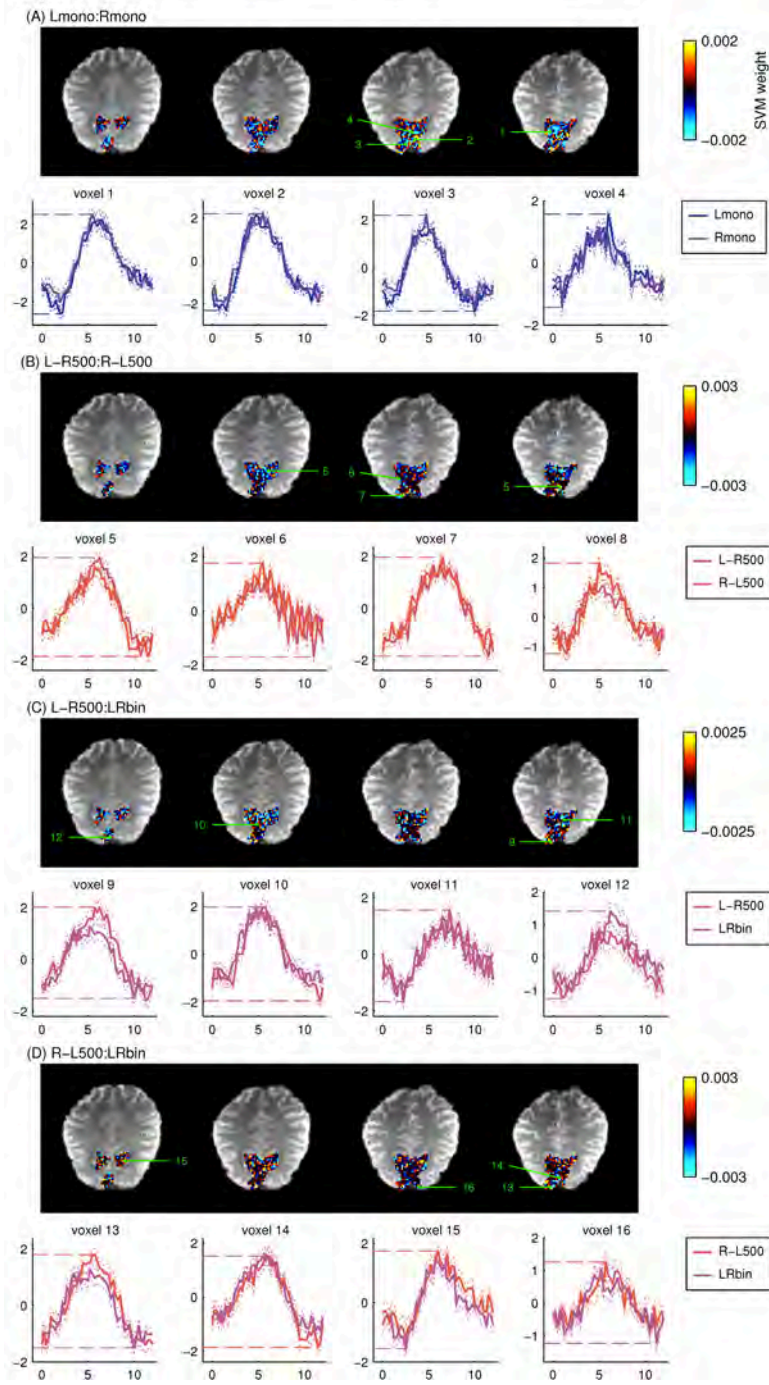

Subject 11 (2)

(E) L-R100:R-L100

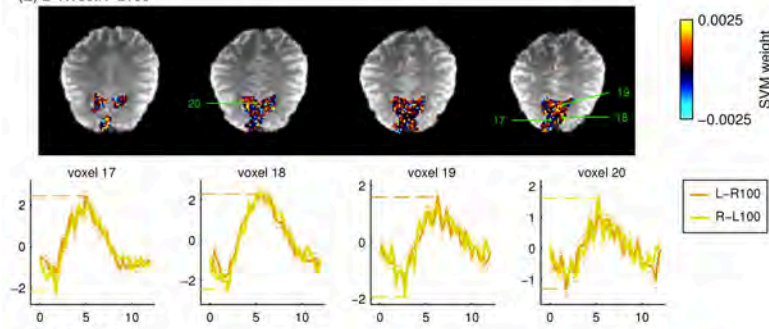

(F) L-R100:LRbin

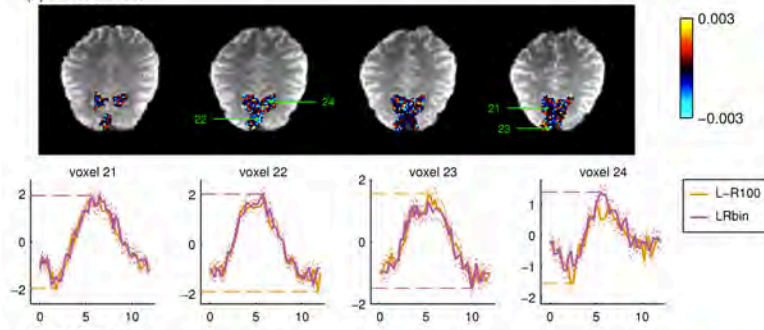

(G) R-L100:LRbin

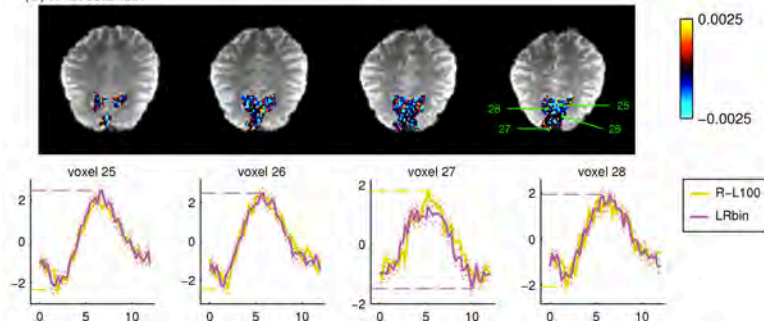



Subject 12 (1)

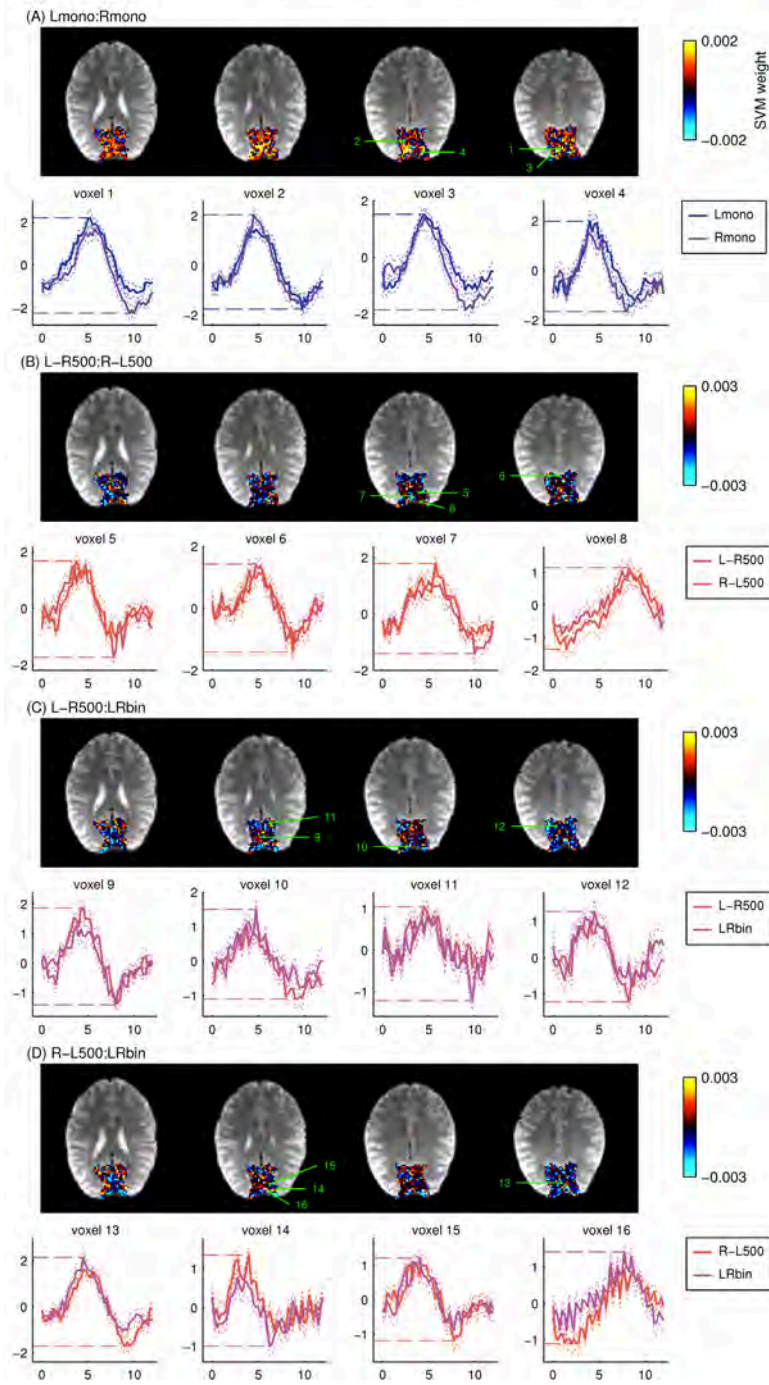

Subject 12 (2)

(E) L-R100:R-L100

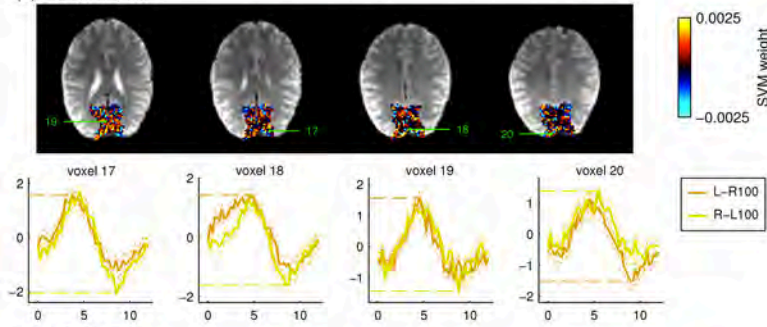

(F) L-R100:LRbin

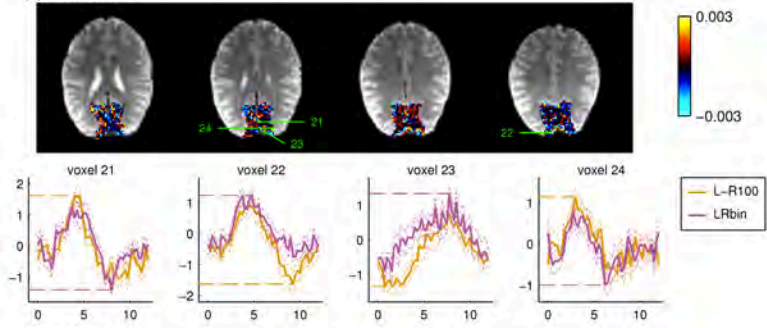

(G) R-L100:LRbin

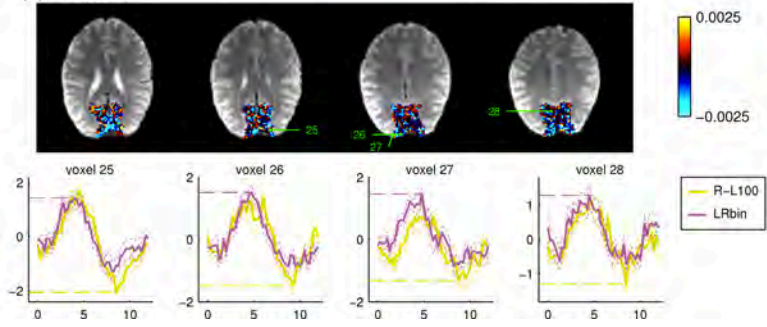

**Supplementary Fig. S3:** Maps of  $t$  values for the ocular dominance response contrast (Lmono - Rmono) for subjects 1 to 12.

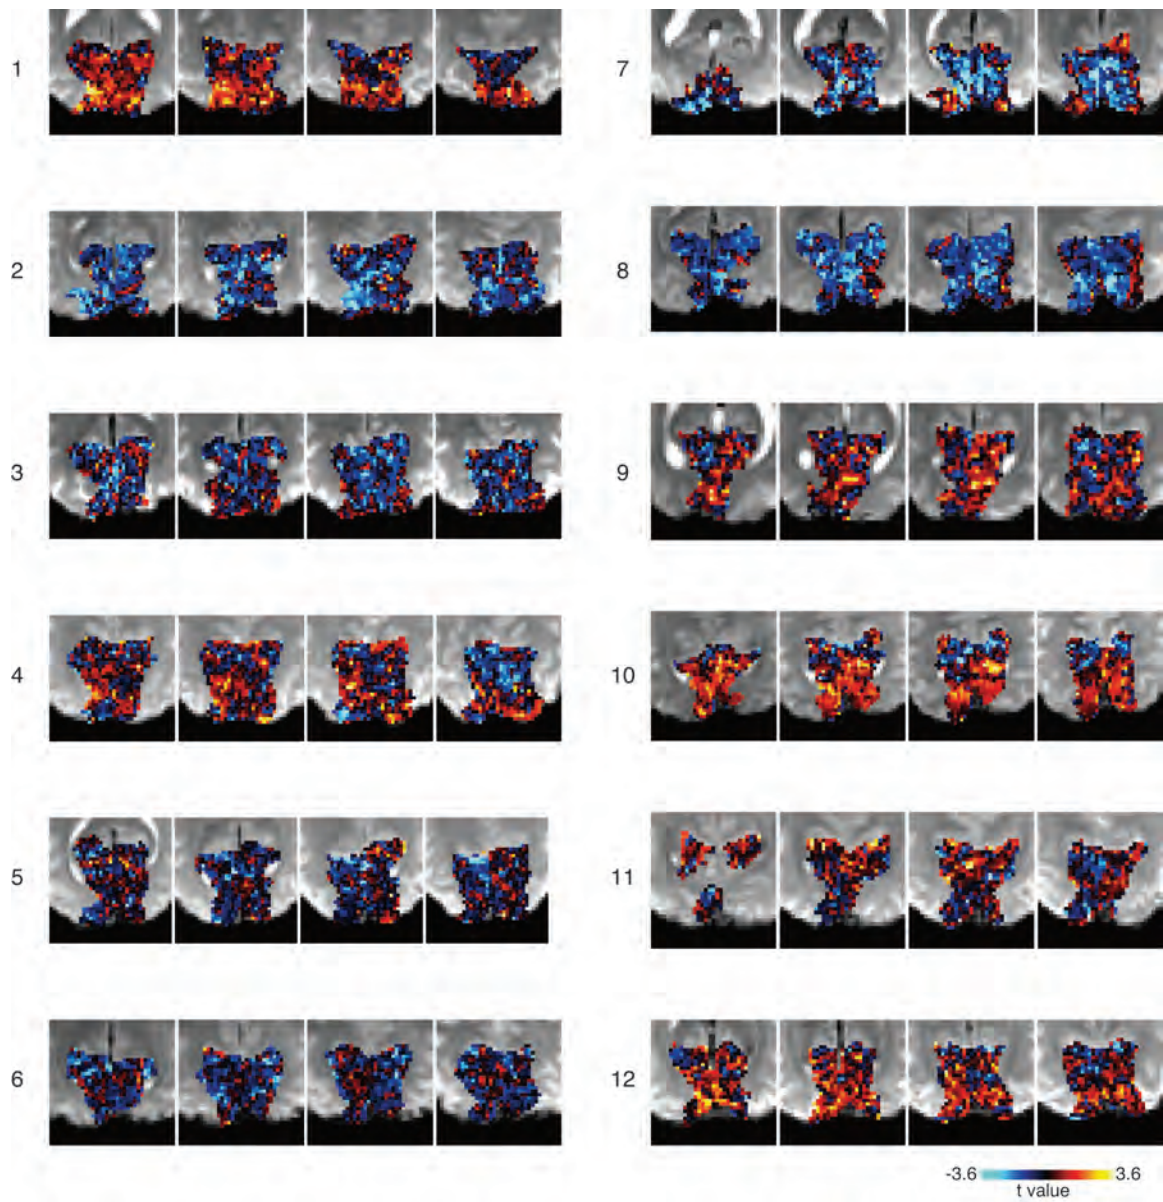

**Supplementary Table. S1:** Correlations between  $t$  values of ocular dominance contrast (Lmono - Rmono) and absolute weights of the support vector machine classifiers.

| Subject | SVM classification contrast |                   |                  |                  |                   |                  |                  |
|---------|-----------------------------|-------------------|------------------|------------------|-------------------|------------------|------------------|
|         | Lmono:<br>Rmono             | L-R500:<br>R-L500 | L-R500:<br>LRbin | R-L500:<br>LRbin | L-R100:<br>R-L100 | L-R100:<br>LRbin | R-L100:<br>LRbin |
| 1       | 0.466                       | 0.058             | 0.192            | 0.097            |                   |                  |                  |
| 2       | 0.249                       | 0.064             | 0.017            | -0.065           |                   |                  |                  |
| 3       | 0.370                       | -0.066            | 0.100            | 0.152            |                   |                  |                  |
| 4       | 0.469                       | -0.085            | -0.045           | 0.028            |                   |                  |                  |
| 5       | 0.360                       | 0.008             | 0.022            | 0.010            |                   |                  |                  |
| 6       | 0.318                       | 0.014             | 0.031            | -0.009           |                   |                  |                  |
| 7       | 0.441                       | 0.007             | -0.095           | -0.083           | -0.111            | -0.079           | 0.032            |
| 8       | 0.442                       | 0.001             | 0.073            | 0.056            | -0.084            | 0.044            | 0.112            |
| 9       | 0.428                       | 0.033             | 0.077            | 0.057            | 0.088             | 0.055            | -0.028           |
| 10      | 0.378                       | 0.027             | -0.040           | -0.065           | 0.049             | 0.015            | -0.018           |
| 11      | 0.506                       | -0.047            | 0.017            | 0.077            | -0.034            | 0.073            | 0.095            |
| 12      | 0.539                       | 0.051             | 0.013            | -0.042           | 0.105             | -0.033           | -0.141           |
